# Supplementary material for: Intrathecal Autologous Thrombin-Activated Condensed Platelet Cytokines in Chronic Neurodegenerative Disease: Anti-inflammatory and Regenerative Responses, Phase I
Source: Preprints.org preprint supplement (doi:10.20944/preprints202306.0809.v1), 2023-06-12
Supplement: Supplementary file 1 [file supplementary]

# Intrathecal autologous condensed PLT cytokine protocol for hyperinflammatory neurodegenerative disease

**Anti-inflammatory sequence (A)** for soluble mediators (blue) processed from autologous platelet (PLT) rich plasma, discharged after thrombin (T) activation. *Where:* Brain-derived neurotrophic factor (BDNF), supports neuron survival and induces differentiation of *de novo* neurons and synapses; Epidermal growth factor (EGF), a central element in cellular proliferation, differentiation, and survival; Fibroblast growth factor (bFGF), a mediator with broad mitogenic and survival actions; Hepatocyte growth factor (HGF), stimulates mitogenesis, cell motility, and matrix invasion with a key role in angiogenesis and tissue regeneration; Insulin like growth factors (IGFs) are required for cell stimulation and response to local microclimate; Interleukin-1 $\beta$  (IL-1 $\beta$ ), a central inflammatory mediator involved in cell proliferation, differentiation, and apoptosis; Interleukin-2 (IL-2), an inducer of T-helper 1 (Th1) and Th2 cell differentiation and antagonist to inflammatory Th17 cells; Interleukin-6 (IL-6), a metabolic regulator and promoter of hypothalamic PGE<sub>2</sub>; Interleukin-8 (IL-8, or ‘neutrophil chemotactic factor’) coordinates local angiogenesis; Interleukin-10 (IL-10) suppresses Th1 cytokines and MHC class II antigens and regulates the JAK-STAT signaling network; Ligand of CD40 (CD-40L), an inflammatory organizer of PLTs, leukocytes, and dendrites; Macrophage inflammatory protein 1-alpha (MIP-1 $\alpha$ ), a conditional trigger for cell migration, survival, and proliferation; Platelet derived growth factor (PDGF), modulates mitogenesis and mesenchymal proliferation; Platelet factor 4 (PF4), a chemotactic protein involved in PLT aggregation; Regulated after Activation of Normal T-cell Expressed and Secreted (RANTES), a monocyte attractant; Transforming growth factor beta (TGF- $\beta$ ), an activator of multiple downstream substrates involved in tissue repair; Tumor necrosis factor (TNF), highly diverse actions with multiple cross-talk nodes balancing cell proliferation and apoptosis; and Vascular endothelial growth factor (VEGF), a promoter of vascular development for improved perfusion. In addition to recorded changes in selected CSF markers, post-program reduction in serum C-reactive protein (CRP) is measured to document systemic anti-inflammatory response.

**Tissue regenerative response (B)** via gene ontology function after representative PLT cytokines (blue) shown with modulated intermediate and hub gene (green) targets associated with neuronal differentiation and downstream tissue effects. *Where:* CNTN2 = Contactin-2, CREB = cAMP responsive element binding protein-1, DLG4 = Discs large MAGUK scaffold protein-4, HOXA1 = Homeobox A1, MAPK8 = Mitogen-activated protein kinase-8, NRCAM = Neuronal cell adhesion molecule, NTRK2 = Neurotrophic receptor tyrosine kinase-2, PAX6 = Paired box protein-6 (aniridia type II protein), SEMA3A = Semaphorin-3A, SLIT1 = Slit guidance ligand-1, YAP = Yes-associated protein. Modified from [68]. Condensed plasma cytokines: BDNF = Brain derived neurotrophic factor, EGF = Epidermal growth factor, FGF = Fibroblast growth factor, IL-2 = Interleukin-2, IL-6 = Interleukin-6, NF-kB = Nuclear factor kappa-light-chain-enhancer of activated B cells, NRP-1 = Neuropilin-1, TGF- $\beta$  = Transforming growth factor- $\beta$ , TNF- $\alpha$  = Tumor necrosis factor-alpha, VEGF = Vascular endothelial growth factor. Both pathways converge synergistically (blue circle) to dampen inflammation and improve cellular function by promotion of tissue repair.
